# Supplementary material for: Effect of wood moisture content and adhesive open time on the adhesion strength of wet bonded Pinus radiata wood
Source: Springer Nature journal article supplement (doi:10.1007/s00107-024-02050-w), 2024-01-28
Supplement: MOESM2 [file 26670452]

## Sheet: Sheet1
adhesive code	open time (min)	shear strength on the bondline perpendicular to the grain (MPa)	treatment MC (%)
H4	4	2.67	101
H4	4	2.19	101
H4	4	2.27	101
H4	4	2.41	101
H4	4	2.24	101
H4	4	2.83	101
H4	4	1.98	101
H4	4	2.26	101
H4	4	2.35	101
H4	4	2.33	101
H4	4	2.6	101
H4	4	2.63	101
H4	4	2.09	101
H4	4	2.21	101
H4	4	2.15	101
H15	15	3.41	101
H15	15	3.01	101
H15	15	2.6	101
H15	15	2.88	101
H15	15	2.69	101
H15	15	2.64	101
H15	15	3.44	101
H15	15	2.95	101
H15	15	2.54	101
H15	15	2.52	101
H15	15	2.41	101
H15	15	2.78	101
H15	15	2.2	101
H15	15	2.37	101
H15	15	2.85	101
H40	40	1.72	101
H40	40	2.5	101
H40	40	2.85	101
H40	40	1.92	101
H40	40	2.07	101
H40	40	2.06	101
H40	40	1.68	101
H40	40	1.6	101
H40	40	1.6	101
H40	40	1.68	101
H40	40	2.34	101
H40	40	3.06	101
H40	40	1.78	101
H40	40	1.74	101
H40	40	2.09	101
H4	4	3.69	30
H4	4	3.98	30
H4	4	3.94	30
H4	4	4.15	30
H4	4	3.67	30
H4	4	3.38	30
H4	4	4.01	30
H4	4	4.34	30
H4	4	3.69	30
H4	4	2.95	30
H4	4	3.68	30
H4	4	3.83	30
H4	4	4.31	30
H4	4	4.13	30
H4	4	4.06	30
H15	15	4.15	30
H15	15	4.79	30
H15	15	4.14	30
H15	15	4.52	30
H15	15	4.44	30
H15	15	4.52	30
H15	15	4.24	30
H15	15	4.57	30
H15	15	4.52	30
H15	15	4.65	30
H15	15	4.45	30
H15	15	5.15	30
H15	15	4.61	30
H15	15	4.81	30
H15	15	4.11	30
H40	40	3.6	30
H40	40	3.98	30
H40	40	4.01	30
H40	40	4.83	30
H40	40	3.59	30
H40	40	3.94	30
H40	40	4.27	30
H40	40	3.94	30
H40	40	3.64	30
H40	40	4.33	30
H40	40	4.02	30
H40	40	4.02	30
H40	40	3.93	30
H40	40	4.28	30
H40	40	4.75	30
