# Supplementary figures and images for: Effect of wood moisture content and adhesive open time on the adhesion strength of wet bonded Pinus radiata wood
Source: Springer Nature journal article supplement (doi:10.1007/s00107-024-02050-w), 2024-01-28

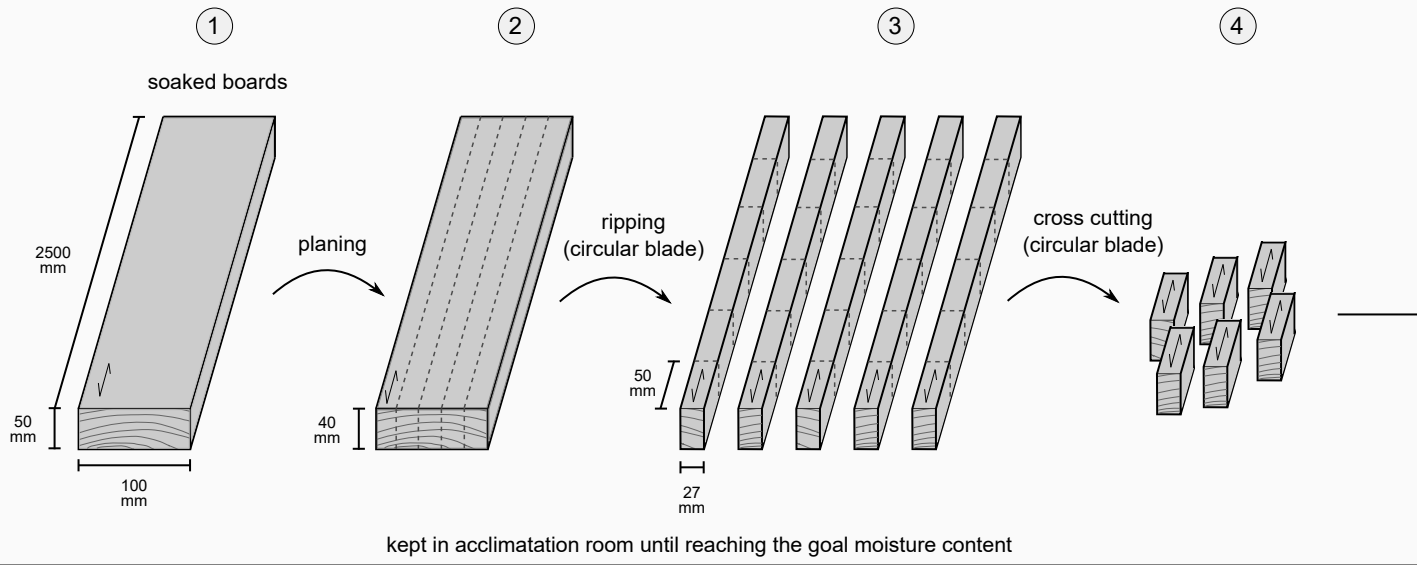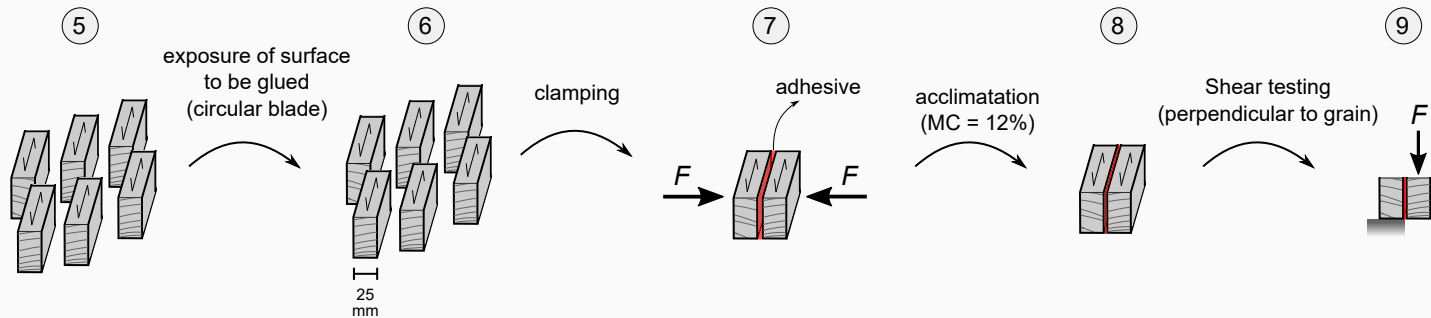

Supplement: MOESM3 [file 26670452]
